# Supplementary material
Source: MDPI journal article supplement (https://www.mdpi.com/2073-4395/14/2/314)
Supplement: s1 [file s1]

---

### Supplementary data

**Table S1.** The changes in yield under different treatments. Different lowercase letters indicate significant differences ( $p < 0.05$ ) among the different treatments of the same parameters.

| Treatment             |         | Number of fruits<br>per plant | Individual fruit<br>weight (g) | Yield per<br>plant<br>(kg) | Yield per unit<br>area<br>(t·ha <sup>-1</sup> ) |
|-----------------------|---------|-------------------------------|--------------------------------|----------------------------|-------------------------------------------------|
| Winter-spring<br>crop | NS-1.4m | 22.4 ± 0.87 a                 | 206.65 ± 8.73 b                | 4.63 ± 0.21 b              | 166.68 ± 7.56 b                                 |
|                       | NS-1.8m | 22.3 ± 0.65 a                 | 212.86 ± 11.89 ab              | 4.75 ± 0.28 ab             | 171.01 ± 10.00 ab                               |
|                       | EW-1.8m | 22.2 ± 0.53 a                 | 218.72 ± 7.99 a                | 4.86 ± 0.21 a              | 174.80 ± 7.56 a                                 |
| Autumn-winter<br>crop | NS-1.4m | 18.2 ± 0.8 a                  | 188.50 ± 17.46 a               | 3.42 ± 0.22 b              | 123.17 ± 7.20 b                                 |
|                       | NS-1.8m | 18.6 ± 1.8 a                  | 199.50 ± 17.17 a               | 3.76 ± 0.20 ab             | 132.80 ± 6.45 ab                                |
|                       | EW-1.8m | 18.6 ± 0.9 a                  | 205.50 ± 16.24 a               | 3.81 ± 0.18 a              | 137.26 ± 6.00 a                                 |

---
